# Supplementary material for: Factors That Affect Oral Care Outcomes for Institutionalized Elderly
Source: Hindawi journal article supplement (doi:10.1155/2018/2478408), 2018-12-10
Supplement: f1 [file 2478408.f1.pdf]

**S1 Table** Characteristics of the subjects analyzed in this study at the start of oral care**Lifestyle independence**

|                                                     | Subjects with follow-up data one year before and after oral care (N=27) |      | Subjects who underwent oral care (N=72) |      | Subjects with more than one year of follow-up(N=57) |      |                |      |                 |      | P-value |       |
|-----------------------------------------------------|-------------------------------------------------------------------------|------|-----------------------------------------|------|-----------------------------------------------------|------|----------------|------|-----------------|------|---------|-------|
|                                                     |                                                                         |      |                                         |      | Start of oral care                                  |      | After 6 months |      | After 12 months |      |         |       |
|                                                     | n                                                                       | %    | n                                       | %    | n                                                   | %    | n              | %    | n               | %    |         |       |
| <b>Certification of the need for long-term care</b> |                                                                         |      |                                         |      |                                                     |      |                |      |                 |      |         |       |
| 1                                                   | 0                                                                       | 0    | 1                                       | 1.4  |                                                     |      |                |      |                 |      |         | 0.003 |
| 2                                                   | 3                                                                       | 11.1 | 5                                       | 6.9  | 5                                                   | 9.4  | 4              | 7.5  | 1               | 1.9  |         |       |
| 3                                                   | 9                                                                       | 33.3 | 20                                      | 27.8 | 16                                                  | 30.2 | 17             | 32.1 | 12              | 22.6 |         |       |
| 4                                                   | 11                                                                      | 40.7 | 26                                      | 36.1 | 22                                                  | 41.5 | 24             | 45.3 | 27              | 54.0 |         |       |
| 5                                                   | 4                                                                       | 14.8 | 20                                      | 27.8 | 10                                                  | 18.9 | 8              | 15.1 | 10              | 20.0 |         |       |
| <b>The degree of independence in everyday life</b>  |                                                                         |      |                                         |      |                                                     |      |                |      |                 |      |         |       |
| A                                                   | 5                                                                       | 18.5 | 9                                       | 12.5 | 9                                                   | 17.0 | 10             | 18.9 | 10              | 18.9 | 0.513   |       |
| B                                                   | 19                                                                      | 70.4 | 53                                      | 73.6 | 37                                                  | 69.8 | 36             | 67.9 | 36              | 71.7 |         |       |
| C                                                   | 2                                                                       | 7.4  | 6                                       | 8.3  | 3                                                   | 5.7  | 4              | 7.5  | 3               | 5.7  |         |       |
| J                                                   | 1                                                                       | 3.7  | 4                                       | 5.6  | 4                                                   | 7.5  | 3              | 5.7  | 2               | 3.8  |         |       |
| <b>Dementia degree of autonomy</b>                  |                                                                         |      |                                         |      |                                                     |      |                |      |                 |      |         |       |
| Independent                                         | 0                                                                       | 0.0  | 4                                       | 5.6  | 3                                                   | 5.7  | 2              | 4.7  | 0               | 0    | 0.097   |       |
| I                                                   | 1                                                                       | 3.7  | 3                                       | 4.2  | 3                                                   | 5.7  | 3              | 7.0  | 2               | 5.3  |         |       |
| II a                                                | 0                                                                       | 0.0  | 4                                       | 5.6  | 3                                                   | 5.7  | 2              | 4.7  | 2               | 5.3  |         |       |
| II b                                                | 6                                                                       | 22.2 | 13                                      | 18.3 | 11                                                  | 20.8 | 9              | 20.9 | 8               | 21.1 |         |       |
| III a                                               | 9                                                                       | 33.3 | 23                                      | 32.4 | 18                                                  | 34.0 | 10             | 23.3 | 12              | 31.6 |         |       |
| III b                                               | 3                                                                       | 11.1 | 6                                       | 8.5  | 5                                                   | 9.4  | 8              | 18.6 | 8               | 21.1 |         |       |
| IV                                                  | 7                                                                       | 25.9 | 16                                      | 22.5 | 9                                                   | 17.0 | 9              | 20.9 | 6               | 15.8 |         |       |
| M                                                   | 1                                                                       | 3.7  | 2                                       | 2.8  | 1                                                   | 1.9  | 0              | 0    | 0               | 0    |         |       |

**Meal and food factors**

|                                | Subjects with follow-up data from one year before and after oral care (N=27) |      | Subjects who underwent oral care (N=72) |      | Subjects with more than one year of follow-up (N=57) |      |                |      |                 |      | P-value |  |
|--------------------------------|------------------------------------------------------------------------------|------|-----------------------------------------|------|------------------------------------------------------|------|----------------|------|-----------------|------|---------|--|
|                                |                                                                              |      |                                         |      | Start of oral care                                   |      | After 6 months |      | After 12 months |      |         |  |
|                                | n                                                                            | %    | n                                       | %    | n                                                    | %    | n              | %    | n               | %    |         |  |
| <b>Meal care</b>               |                                                                              |      |                                         |      |                                                      |      |                |      |                 |      |         |  |
| Independent                    | 18                                                                           | 66.7 | 45                                      | 62.5 | 37                                                   | 69.8 | 35             | 66.0 | 22              | 41.5 | 0.022   |  |
| Needs care                     | 4                                                                            | 14.8 | 9                                       | 12.5 | 7                                                    | 13.2 | 7              | 13.2 | 9               | 17.0 |         |  |
| Dependent                      | 5                                                                            | 18.5 | 18                                      | 25.0 | 9                                                    | 17.0 | 10             | 18.9 | 21              | 39.6 |         |  |
| <b>Food prescription</b>       |                                                                              |      |                                         |      |                                                      |      |                |      |                 |      |         |  |
| Ordinary food                  | 12                                                                           | 44.4 | 29                                      | 40.3 | 22                                                   | 41.5 | 19             | 35.8 | 19              | 35.8 | 0.761   |  |
| Sliced food                    | 3                                                                            | 11.1 | 9                                       | 12.5 | 9                                                    | 17.0 | 9              | 17.0 | 7               | 13.2 |         |  |
| Pureed food                    | 12                                                                           | 44.4 | 32                                      | 44.4 | 21                                                   | 39.6 | 23             | 43.4 | 22              | 41.5 |         |  |
| Liquid food                    | 0                                                                            | 0    | 0                                       | 0    | 1                                                    | 1.9  | 2              | 3.8  | 3               | 5.7  |         |  |
| <b>Arousal during the meal</b> |                                                                              |      |                                         |      |                                                      |      |                |      |                 |      |         |  |
| +                              | 24                                                                           | 88.9 | 59                                      | 81.9 | 50                                                   | 94.3 | 50             | 94.3 | 45              | 84.9 | 0.074   |  |
| -                              | 3                                                                            | 11.1 | 13                                      | 18.1 | 3                                                    | 5.7  | 2              | 3.8  | 6               | 11.3 |         |  |

## Oral function, oral health status and independence

|                                                  | Subjects with follow-up data from one year before and after oral care (N=27) |      | Subjects who underwent oral care (N=72) |      | Subjects with more than one year of follow-up(N=57) |      |                |      |                 |      | P-value |  |
|--------------------------------------------------|------------------------------------------------------------------------------|------|-----------------------------------------|------|-----------------------------------------------------|------|----------------|------|-----------------|------|---------|--|
|                                                  | n                                                                            | %    | n                                       | %    | Start of oral care                                  |      | After 6 months |      | After 12 months |      |         |  |
|                                                  |                                                                              |      |                                         |      | n                                                   | %    | n              | %    | n               | %    |         |  |
| <b>Swallowing difficulty</b>                     |                                                                              |      |                                         |      |                                                     |      |                |      |                 |      |         |  |
| Residue -                                        | 44                                                                           | 81.5 | 52                                      | 72.2 | 40                                                  | 75.5 | 48             | 90.6 | 45              | 84.9 | 0.999<  |  |
| Residue +                                        | 8                                                                            | 14.8 | 8                                       | 11.1 | 6                                                   | 11.3 | 2              | 3.8  | 2               | 3.8  |         |  |
| Unable to swallow                                | 2                                                                            | 3.7  | 1                                       | 1.4  | 1                                                   | 1.9  | 3              | 5.7  | 6               | 11.3 |         |  |
| <b>Dentures</b>                                  |                                                                              |      |                                         |      |                                                     |      |                |      |                 |      |         |  |
| -                                                | 28                                                                           | 51.9 | 35                                      | 48.6 | 23                                                  | 43.4 | 22             | 41.5 | 21              | 39.6 | 0.197   |  |
| +                                                | 26                                                                           | 48.1 | 37                                      | 51.4 | 30                                                  | 56.6 | 30             | 56.6 | 30              | 56.6 |         |  |
| <b>Need care or attention for tooth brushing</b> |                                                                              |      |                                         |      |                                                     |      |                |      |                 |      |         |  |
| Independent                                      | 18                                                                           | 33.3 | 27                                      | 37.5 | 24                                                  | 45.3 | 20             | 37.7 | 15              | 28.3 | <0.001  |  |
| Needs care                                       | 14                                                                           | 25.9 | 16                                      | 22.2 | 12                                                  | 22.6 | 10             | 18.9 | 7               | 13.2 |         |  |
| Dependent                                        | 22                                                                           | 40.7 | 29                                      | 40.3 | 17                                                  | 32.1 | 22             | 41.5 | 29              | 54.7 |         |  |
| <b>Candida</b>                                   |                                                                              |      |                                         |      |                                                     |      |                |      |                 |      |         |  |
| <750 cfu                                         | 36                                                                           | 66.7 | 40                                      | 55.6 | 15                                                  | 28.3 | 21             | 39.6 |                 |      | 0.162   |  |
| >=750 cfu                                        | 18                                                                           | 33.3 | 22                                      | 30.6 | 33                                                  | 62.3 | 16             | 30.2 |                 |      |         |  |

Fifty-seven subjects had more than one year of follow-up data. Changes in parameters were analyzed by Friedman test.

**S2 Table** Effects of oral care independence on fever according to participation in the oral care program and number of functional teeth  
(A) With or without dentures, (B) Assistance with tooth brushing, (C) Food test (swallowing function)

|                                                    | Model S2 (A) |           |        |         | Model S2 (B) |        |        |           | Model S2 (C) |        |           |           | Model S2 (D) |        |        |         |       |
|----------------------------------------------------|--------------|-----------|--------|---------|--------------|--------|--------|-----------|--------------|--------|-----------|-----------|--------------|--------|--------|---------|-------|
|                                                    | Coefficient  | 95% CI    |        | P-value | Coefficient  | 95% CI |        | P-value   | Coefficient  | 95% CI |           | P-value   | Coefficient  | 95% CI |        | P-value |       |
|                                                    |              | Lower     | Upper  |         |              | Lower  | Upper  |           |              | Lower  | Upper     |           |              | Lower  | Upper  |         |       |
| <b>Intercept</b>                                   | 0.285        | -0.211    | 0.780  | 0.254   | 0.689        | 0.161  | 1.217  | 0.012     | 0.205        | -0.133 | 0.543     | 0.229     | 0.066        | -0.197 | 0.33   | 0.615   |       |
| <b>Oral care</b>                                   | -            | Reference |        |         | Reference    |        |        |           | Reference    |        |           | Reference |              |        |        |         |       |
|                                                    | +            | 0.724     | 0.176  | 1.273   | 0.011        | 0.636  | 0.106  | 1.166     | 0.020        | 0.675  | 0.069     | 1.280     | 0.030        | 0.935  | 0.324  | 1.547   | 0.003 |
| <b>Number of functional teeth</b>                  |              | 0.030     | -0.005 | 0.064   | 0.087        | 0.018  | -0.009 | 0.044     | 0.185        | 0.035  | <0.001    | 0.070     | 0.052        | 0.045  | 0.011  | 0.079   | 0.010 |
| <b>Interaction with number of functional teeth</b> |              |           |        |         |              |        |        |           |              |        |           |           |              |        |        |         |       |
| <b>Oral care</b>                                   | -            | Reference |        |         | Reference    |        |        |           | Reference    |        |           | Reference |              |        |        |         |       |
|                                                    | +            | -0.054    | -0.099 | -0.009  | 0.020        | -0.04  | -0.076 | -0.004    | 0.028        | -0.050 | -0.096    | -0.004    | 0.034        | -0.064 | -0.114 | -0.015  | 0.012 |
| <b>Dentures</b>                                    |              |           |        |         |              |        |        |           |              |        |           |           |              |        |        |         |       |
|                                                    | -            | Reference |        |         |              |        |        |           |              |        |           |           |              |        |        |         |       |
|                                                    | +            | -0.237    | -0.706 | 0.232   | 0.315        |        |        |           |              |        |           |           |              |        |        |         |       |
| <b>Needs assistance with tooth brushing</b>        |              |           |        |         |              |        |        |           |              |        |           |           |              |        |        |         |       |
| Independent                                        |              |           |        |         | Reference    |        |        |           |              |        |           |           |              |        |        |         |       |
| Needs attention                                    |              |           |        |         | -0.622       | -1.16  | -0.084 | 0.024     |              |        |           |           |              |        |        |         |       |
| Dependent                                          |              |           |        |         | -0.647       | -1.158 | -0.136 | 0.014     |              |        |           |           |              |        |        |         |       |
| <b>Swallowing ability</b>                          |              |           |        |         |              |        |        |           |              |        |           |           |              |        |        |         |       |
| Possible                                           |              |           |        |         |              |        |        | Reference |              |        |           |           |              |        |        |         |       |
| Impossible                                         |              |           |        |         |              |        |        | -0.435    | -0.816       | -0.054 | 0.026     |           |              |        |        |         |       |
| <b>Meal support</b>                                |              |           |        |         |              |        |        |           |              |        |           |           |              |        |        |         |       |
| Independent                                        |              |           |        |         |              |        |        |           |              |        | Reference |           |              |        |        |         |       |
| Needs support                                      |              |           |        |         |              |        |        |           |              |        | -0.312    | -0.622    | -0.002       | 0.048  |        |         |       |

With or without dentures was not statistically significant. Needs attention and dependent for tooth brushing were statistically significant. Their coefficients were negative. Inability to swallow was statistically significant.

The results indicate that the oral care program was effective for subjects who were not fully independent during tooth brushing and for those with dysphagia. The effect of the oral care program was not associated with denture use. This may be because dedicated attention was paid to denture wearers and because detailed denture care instructions were provided for the nurses and caregivers.

**S3 Table** Effects of the interaction of dietary or meal factors with the oral care program and the number of functional teeth on the incidence of fever

| <b>Model S3 (A)</b>                             |                         |             |        |       |         |
|-------------------------------------------------|-------------------------|-------------|--------|-------|---------|
|                                                 |                         | Coefficient | 95% CI |       | P-value |
|                                                 |                         |             | Lower  | Upper |         |
| <b>Intercept</b>                                |                         | 0.222       | -0.002 | 0.446 | 0.052   |
| <b>Interaction with oral care and meal care</b> |                         |             |        |       |         |
| <b>Oral care (+)</b>                            | <b>Independent</b>      | Reference   |        |       |         |
|                                                 | <b>Needs attention</b>  | 2.028       | 0.5    | 3.556 | 0.010   |
|                                                 | <b>Needs assistance</b> | -0.222      | -0.446 | 0.002 | 0.052   |
| <b>Oral care (-)</b>                            | <b>Independent</b>      | 0.167       | -0.205 | 0.538 | 0.371   |
|                                                 | <b>Needs attention</b>  | 1.778       | 0.335  | 3.220 | 0.017   |
|                                                 | <b>Needs assistance</b> | 0.178       | -0.435 | 0.790 | 0.562   |

  

| <b>Model S3 (B)</b>                                     |                 |             |        |       |         |
|---------------------------------------------------------|-----------------|-------------|--------|-------|---------|
|                                                         |                 | Coefficient | 95% CI |       | P-value |
|                                                         |                 |             | Lower  | Upper |         |
| <b>Intercept</b>                                        |                 | 0.417       | 0.042  | 0.791 | 0.030   |
| <b>Interaction with oral care and food prescription</b> |                 |             |        |       |         |
| <b>Oral care (+)</b>                                    | <b>Ordinary</b> | Reference   |        |       |         |
|                                                         | <b>Sliced</b>   | 1.250       | -0.295 | 2.795 | 0.110   |
|                                                         | <b>Pureed</b>   | -0.167      | -0.641 | 0.307 | 0.483   |
| <b>Oral care (-)</b>                                    | <b>Ordinary</b> | -0.083      | -0.586 | 0.419 | 0.740   |
|                                                         | <b>Sliced</b>   | 0.917       | -0.475 | 2.308 | 0.192   |
|                                                         | <b>Pureed</b>   | 0.333       | -0.294 | 0.960 | 0.290   |

  

| <b>Model S3 (C)</b>                                     |                   |             |        |       |         |
|---------------------------------------------------------|-------------------|-------------|--------|-------|---------|
|                                                         |                   | Coefficient | 95% CI |       | P-value |
|                                                         |                   |             | Lower  | Upper |         |
| <b>Intercept</b>                                        |                   | 0.500       | 0.210  | 0.790 | 0.001   |
| <b>Interaction with oral care and food prescription</b> |                   |             |        |       |         |
| <b>Oral care (+)</b>                                    | <b>Arousal(+)</b> | Reference   |        |       |         |
|                                                         | <b>Arousal(-)</b> | -0.167      | -0.896 | 0.563 | 0.648   |
| <b>Oral care (-)</b>                                    | <b>Arousal(+)</b> | -0.167      | -0.541 | 0.208 | 0.375   |
|                                                         | <b>Arousal(-)</b> | 2.500       | 0.471  | 4.529 | 0.017   |

| <b>Model S3 (D)</b>                                              |             |           |          |         |
|------------------------------------------------------------------|-------------|-----------|----------|---------|
|                                                                  | Coefficient | 95% CI    |          | P-value |
|                                                                  |             | Lower     | Upper    |         |
| <b>Intercept</b>                                                 | 1.193       | -4392.762 | 4395.148 | 0.999<  |
| <b>Interaction with number of functional teeth and meal care</b> |             |           |          |         |
| <b>Independent</b>                                               | -0.017      | -411.164  | 411.13   | 0.999<  |
| <b>Needs attention</b>                                           | 0.033       | -507.696  | 507.763  | 0.999<  |
| <b>Needs assistance</b>                                          | -0.056      | -587.035  | 586.923  | 0.999<  |

| <b>Model S3 (E)</b>                                                      |             |        |        |         |
|--------------------------------------------------------------------------|-------------|--------|--------|---------|
|                                                                          | Coefficient | 95% CI |        | P-value |
|                                                                          |             | Lower  | Upper  |         |
| <b>Intercept</b>                                                         | <0.001      | <0.001 | <0.001 | 0.999<  |
| <b>Interaction with number of functional teeth and food prescription</b> |             |        |        |         |
| <b>Ordinary</b>                                                          | 0.033       | 0.011  | 0.055  | 0.004   |
| <b>Sliced</b>                                                            | 0.136       | 0.045  | 0.228  | 0.004   |
| <b>Pureed</b>                                                            | <0.001      | <0.001 | <0.001 | 0.999<  |

| <b>Model S3 (F)</b>                                                         |             |        |       |         |
|-----------------------------------------------------------------------------|-------------|--------|-------|---------|
|                                                                             | Coefficient | 95% CI |       | P-value |
|                                                                             |             | Lower  | Upper |         |
| <b>Intercept</b>                                                            | -0.102      | -0.373 | 0.169 | 0.451   |
| <b>Interaction with number of functional teeth and arousal at meal time</b> |             |        |       |         |
| <b>Arousal(+)</b>                                                           | 0.024       | -0.002 | 0.049 | 0.067   |
| <b>Arousal(-)</b>                                                           | 0.047       | -0.017 | 0.111 | 0.148   |

The interactions between the need for attention at meal time and participation/nonparticipation in the oral care program and between nonarousal during the meal and no oral care program had statistically significant effects on the incidence of fever. The interactions between dietary prescription and oral care program were not statistically significant. In contrast, the interaction between the number of functional teeth and ordinary and sliced food prescriptions had significant effects on the risk of fever. The coefficient for the prescription of sliced food was higher for the prescription of ordinary food.

**S4 Table** Effect of the interactions of *Candida* and oral care and candida and number of functional teeth on fever

| <b>Model S4 (A)</b>                                                 |                         |             |        |       |         |
|---------------------------------------------------------------------|-------------------------|-------------|--------|-------|---------|
|                                                                     |                         | Coefficient | 95% CI |       | P-value |
|                                                                     |                         |             | Lower  | Upper |         |
| <b>Intercept</b>                                                    |                         | 0.389       | 0.094  | 0.684 | 0.011   |
| <b>Interaction with oral care and oral levels of <i>Candida</i></b> |                         |             |        |       |         |
| <b>Oral care (-)</b>                                                | <i>Candida</i> <750 cfu | Reference   |        |       |         |
|                                                                     | <i>Candida</i> ≥750 cfu | 0.278       | -0.344 | 0.899 | 0.373   |
| <b>Oral care (+)</b>                                                | <i>Candida</i> <750 cfu | -0.167      | -0.537 | 0.203 | 0.370   |
|                                                                     | <i>Candida</i> ≥750 cfu | 1.056       | 0.198  | 1.913 | 0.017   |

| <b>Model S4 (B)</b>                                                                  |          |             |        |       |         |
|--------------------------------------------------------------------------------------|----------|-------------|--------|-------|---------|
|                                                                                      |          | Coefficient | 95% CI |       | P-value |
|                                                                                      |          |             | Lower  | Upper |         |
| <b>Intercept</b>                                                                     |          | 0.389       | 0.094  | 0.684 | 0.011   |
| <b>Interaction with number of functional teeth and oral levels of <i>Candida</i></b> |          |             |        |       |         |
| <b><i>Candida</i></b>                                                                | <750 cfu | 0.030       | 0.002  | 0.059 | 0.038   |
|                                                                                      | ≥750 cfu | 0.071       | 0.028  | 0.114 | 0.002   |

Coefficient of interaction of oral *Candida* ≥750 cfu and oral care (+) was statistically significant and its coefficient was positive. The results indicated that the risk of pyrexia may increase by the oral care for the subjects with higher levels of *Candida*. And interactions of *Candida* and number of functional teeth had statistically significant coefficient. Coefficient of *Candida* levels ≥750 cfu was higher than that of <750 cfu.

# S1 File Model Specification

## Model 1

Multilevel random slope and random intercept model for the incidence of fever.

Below, fixed effects (random effects or error terms) are denoted by Greek letters (alphabet).

Model 1 Subjects and oral care are indexed by  $ij$ .

$$P_o(X_o) = \pi_{0i} + \pi_{1i}(\text{Number of functional teeth})_i + \varepsilon_{1ij} \sum_{m=1}^2 \pi_{2i}^{(m)} (\text{Oral care})_i \\ + \sum_{m=1}^2 \pi_{2i}^{(m)} (\text{Oral care})_{ij} \times (\text{Number of functional teeth})_i + \varepsilon_{2ij}$$

where  $e_i \sim N(0, \delta_e^2)$  and  $e_{ij} \sim N(0, \delta_e^2)$

Data structure: Subjects, oral care

Random effects

Oral care level: Intercept, random slope for oral care

Random effect covariance: variance component

Where  $X_0$ : Fever,  $X_1$ : Hospitalization,  $X_2$ : Hospitalization for pneumonia for Model 1(A),(B) and (C), respectively

## SPSS Syntax

\*Generalized Linear Mixed Models.

GENLINMIXED

/DATA\_STRUCTURE SUBJECTS=Subjects

/FIELDS TARGET=X<sub>0</sub> TRIALS=NONE OFFSET=NONE

/TARGET\_OPTIONS DISTRIBUTION=POISSON LINK=IDENTITY

/FIXED EFFECTS=Oralcare Numberoffunctionalteeth Oralcare \*Numberoffunctionalteeth USE\_INTERCEPT=TRUE

/RANDOM EFFECTS=Oralcare USE\_INTERCEPT=TRUE SUBJECTS=Subjects COVARIANCE\_TYPE=VARIANCE\_COMPONENTS

/BUILD\_OPTIONS TARGET\_CATEGORY\_ORDER=ASCENDING INPUTS\_CATEGORY\_ORDER=ASCENDING MAX\_ITERATIONS=100

CONFIDENCE\_LEVEL=95 DF\_METHOD=RESIDUAL COVB=MODEL PCONVERGE=0.000001(ABSOLUTE) SCORING=0

SINGULAR=0.000000000001

/EMMEANS\_OPTIONS SCALE=ORIGINAL PADJUST=LSD.



## Models 2, 3

Multilevel random slope and random intercept model for the incidence of fever according to dietary or meal factors and *Candida*.

Below, fixed effects (random effects or error terms) are denoted by Greek letters (alphabet).

Model 1 Subjects and oral care are indexed by  $ij$ .

$$P_o(\text{Fever}) = \pi_{0i} + \pi_{1i}(\text{Number of functional teeth})_i + \varepsilon_{1ij} \sum_{m=1}^2 \pi_{2i}^{(m)}(\text{Oral care})_i \\ + \sum_{m=1}^2 \pi_{2i}^{(m)}(\text{Oral care})_{ij} \times (\text{Number of functional teeth})_i + \sum_{m=1}^2 \pi_{2i}^{(m)}(X_o)_i + \varepsilon_{2ij}$$

where  $e_i \sim N(0, \delta_e^2)$  and  $e_{ij} \sim N(0, \delta_e^2)$

Data structure: Subjects, Oral care

Random effects

Oral care level: Intercept, random slope for oral care

Random effect covariance: Variance component

Where  $X_0$ : Meal care,  $X_1$ : Food prescription,  $X_2$ : Arousal during meals, and  $X_4$ : Oral levels of *Candida* for Model 2(A), (B), (C) and (D), respectively

## SPSS Syntax

\*Generalized Linear Mixed Models.

GENLINMIXED

/DATA\_STRUCTURE SUBJECTS=Subjects

/FIELDS TARGET=Pyrexia TRIALS=NONE OFFSET=NONE

/TARGET\_OPTIONS DISTRIBUTION=POISSON LINK=IDENTITY

/FIXED EFFECTS=Oralcare Numberoffunctionalteeth Oralcare \*Numberoffunctionalteeth Xo USE\_INTERCEPT=TRUE

/RANDOM EFFECTS=Oralcare USE\_INTERCEPT=TRUE SUBJECTS=Subjects COVARIANCE\_TYPE=VARIANCE\_COMPONENTS

/BUILD\_OPTIONS TARGET\_CATEGORY\_ORDER=ASCENDING INPUTS\_CATEGORY\_ORDER=ASCENDING MAX\_ITERATIONS=100

CONFIDENCE\_LEVEL=95 DF\_METHOD=RESIDUAL COVB=MODEL PCONVERGE=0.000001(ABSOLUTE) SCORING=0

SINGULAR=0.000000000001

/EMMEANS\_OPTIONS SCALE=ORIGINAL PADJUST=LSD.

### Model 3

Generalized linear model for the incidence of fever according to the number of functional teeth, dietary or meal factors and *Candida*.

Below, error terms are denoted by Greek letters (alphabet).

Subjects are indexed by  $i$ .

$$P_o(\text{Fever}) = \alpha_1(\text{Number of functional teeth})_i + \alpha_2 \sum_{m=1}^n (\text{Meal care})_i + \alpha_3 \sum_{m=1}^n (\text{Food prescripton})_i + \alpha_4 \sum_{m=1}^n (\text{Apousal})_i + \alpha_5 \sum_{m=1}^n (\text{Candida})_i + \varepsilon_i$$

### SPSS Syntax

```
GENLIN Pyrexia BY Mealcare Foodprescription Arousal Candida (ORDER=ASCENDING) WITH Functionalteeh
```

```
/MODEL Mealcare Foodprescription Arousal Candida Functionalteeh INTERCEPT=YES
```

```
DISTRIBUTION=POISSON LINK=LOG
```

```
/CRITERIA METHOD=FISHER(1) SCALE=1 COVB=MODEL MAXITERATIONS=100 MAXSTEPHALVING=5
```

```
PCONVERGE=1E-006(Absolute) SINGULAR=1E-012 ANALYSISTYPE=3(WALD) CILEVEL=95 CITYPE=WALD
```

```
LIKELIHOOD=FULL
```

```
/MISSING CLASSMISSING=EXCLUDE
```

```
/PRINT CPS DESCRIPTIVES MODELINFO FIT SUMMARY SOLUTION.
```

## Model 4

Cox's proportional hazard model for the time between the start of the oral care program and the incidence of fever according to the number of functional teeth, dietary and meal factors and *Candida*.

$$h(t|x) = h_0(t)\exp(a_1x_1 + a_2x_2 + a_3x_3 + a_4x_4 + a_5x_5)$$

### SPSS Syntax

BOOTSTRAP

/SAMPLING METHOD=SIMPLE

/VARIABLES INPUT=O1 OT1 v12 vc06 v26 v07 v08

/CRITERIA CILEVEL=95 CITYPE=PERCENTILE NSAMPLES=1000

/MISSING USERMISSING=EXCLUDE.

COXREG OT1

/STATUS=O1(1)

/CONTRAST (v12)=Indicator

/CONTRAST (v26)=Indicator

/CONTRAST (v07)=Indicator

/CONTRAST (v08)=Indicator

/METHOD=ENTER vc06 v07 v08 v12 v26

/PRINT=CI(95)

/CRITERIA=PIN(.05) POUT(.10) ITERATE(20).

## S2 File

Colony counts of *Candida* depend on the number of samples. With swab sampling, it is impossible to obtain a uniform number of samples. Therefore, we dichotomized the colony count of *Candida* using the following methodology.

(A) ROC curves were used to set the cutoff point of oral levels of *Candida* for fever.

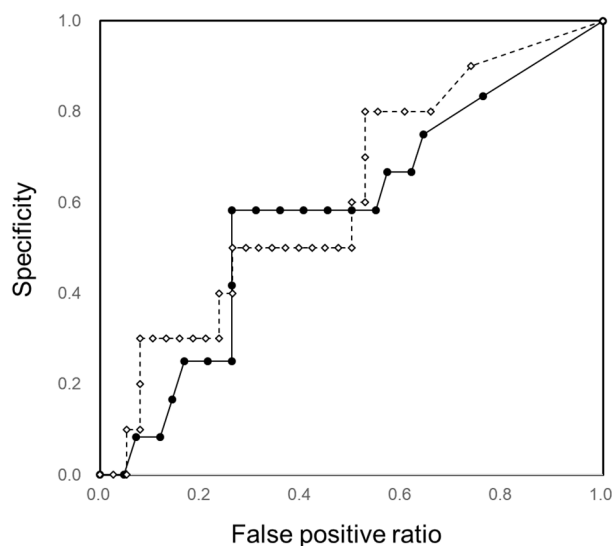

The solid line indicates the 27 subjects who did and did not receive the oral care intervention. The dotted line indicates the data for 53 subjects for one year after receiving oral care. The optimal cut off points were between 700 cfu and 785 cfu for the 27 subjects who did and did not receive oral care and between 735 cfu and 785 cfu for the 53 subjects with data for one year after receiving oral care. Therefore, in this study, the cut-off point was conventionally set as 750 cfu.

(B) Cross tabulations of oral levels of *Candida* and fever

| Data                      |       |   | <i>Candida</i> |           |
|---------------------------|-------|---|----------------|-----------|
|                           |       |   | <750 cfu       | 750 cfu<= |
| With or without oral care | Fever | + | 5              | 7         |
|                           |       | - | 31             | 11        |
| Oral care                 | Fever | + | 5              | 5         |
|                           |       | - | 10             | 28        |

(C) Precision of the cut-off point

| Data                      | Sensitivity | Specificity | Positive predictive vale | Negative predictive vale | AUR  | Likelihood ratio |
|---------------------------|-------------|-------------|--------------------------|--------------------------|------|------------------|
| With or without oral care | 0.58        | 0.74        | 0.39                     | 0.86                     | 0.58 | 1.77             |
| Oral care                 | 0.50        | 0.74        | 0.33                     | 0.85                     | 0.62 | 1.47             |

AUR: Area under the ROC curve

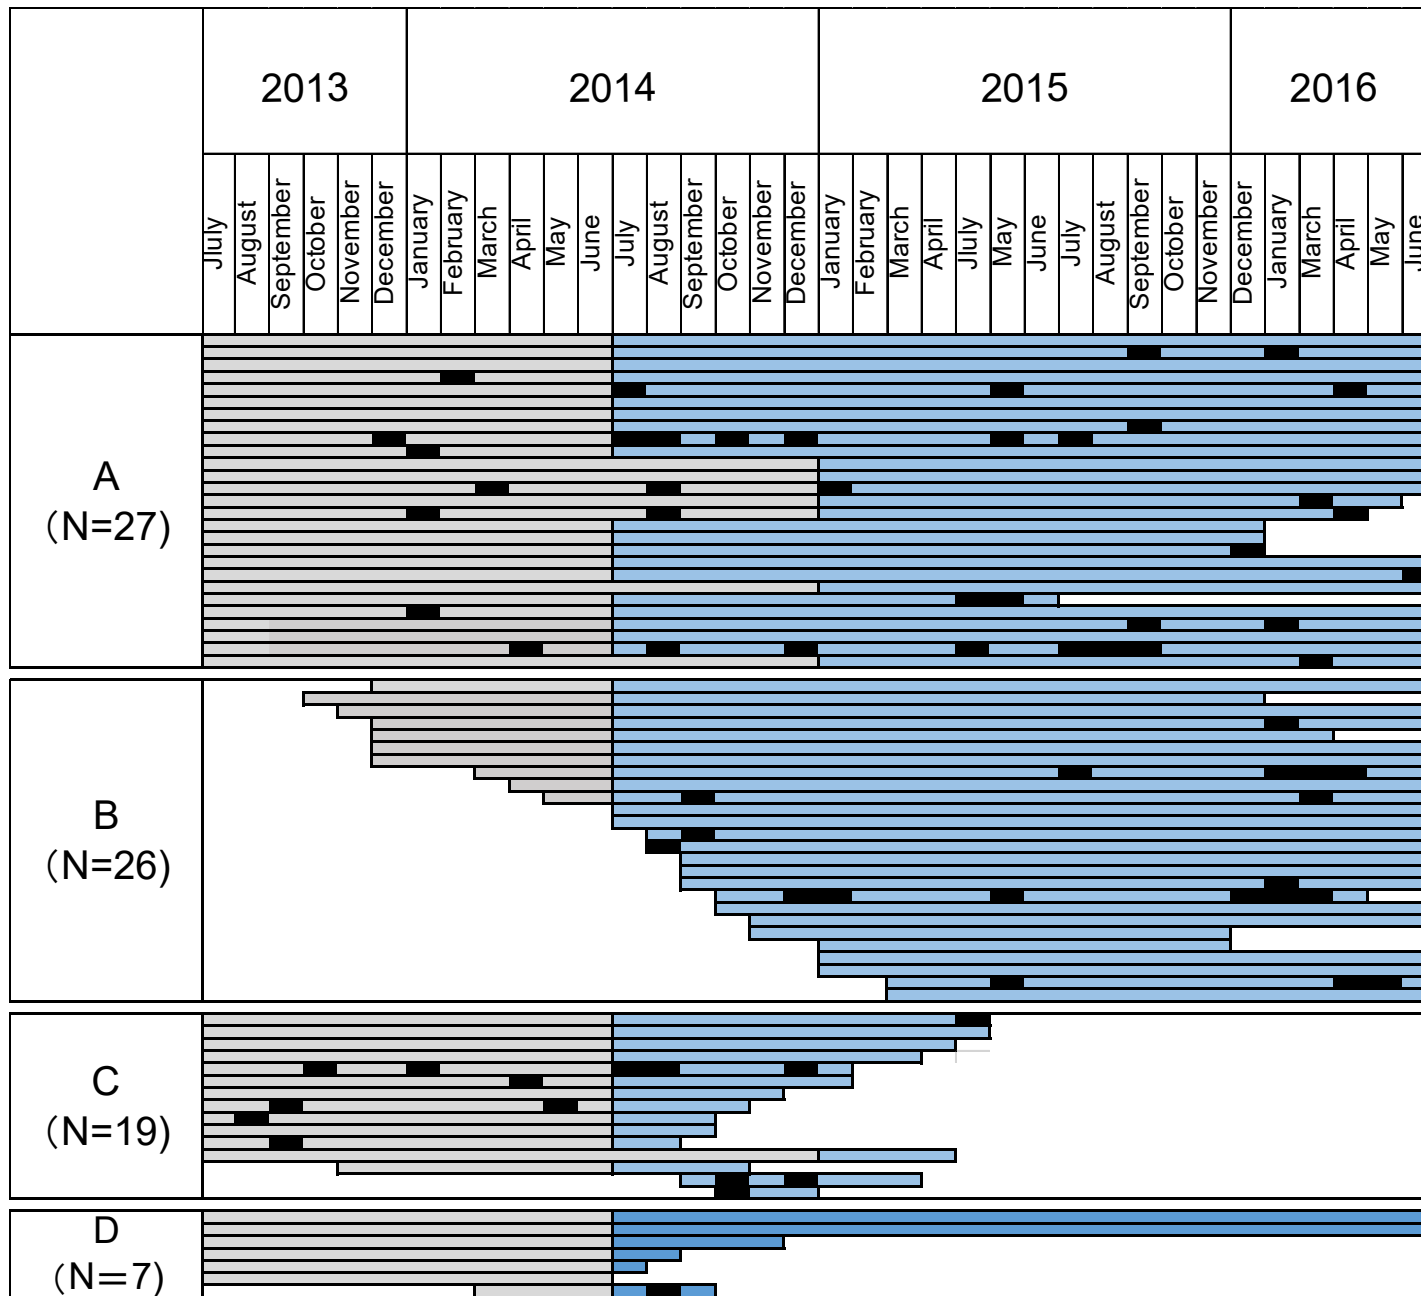

S1 Figure

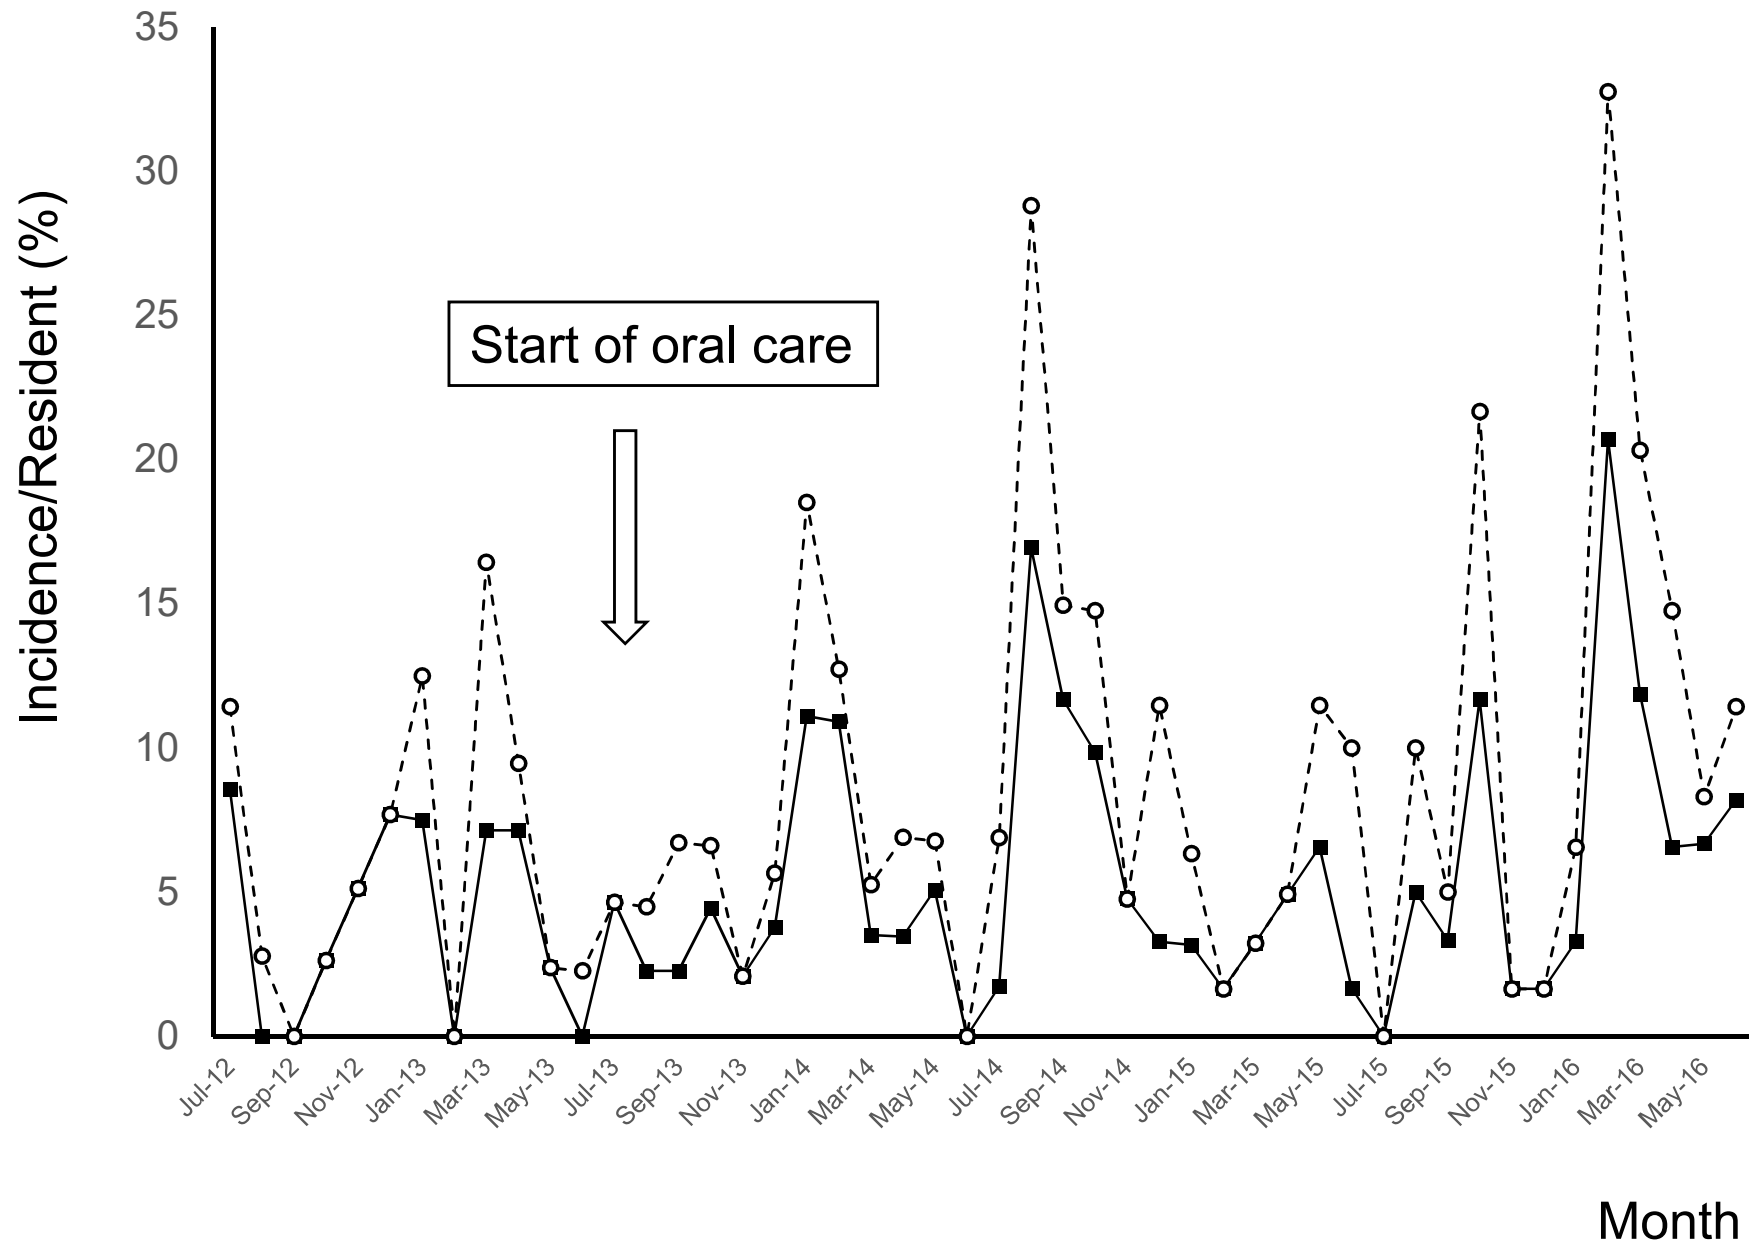

S2 Figure

Distribution of the incidence of fever, hospitalization and hospitalization for pneumonia with or without oral care intervention

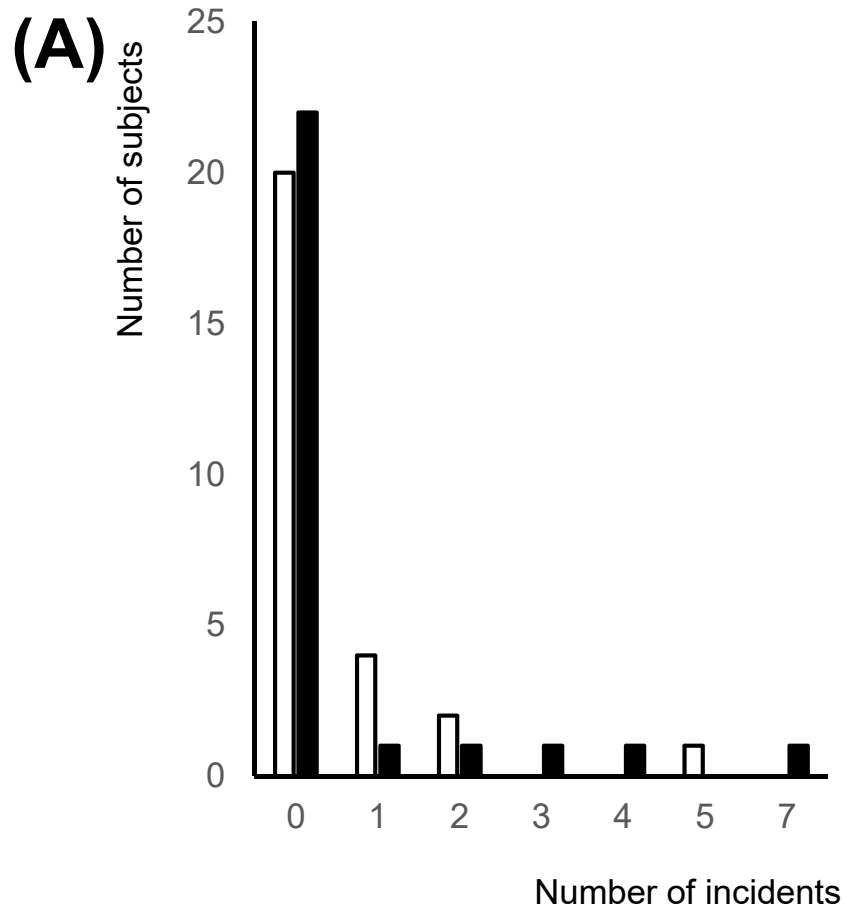

Fever

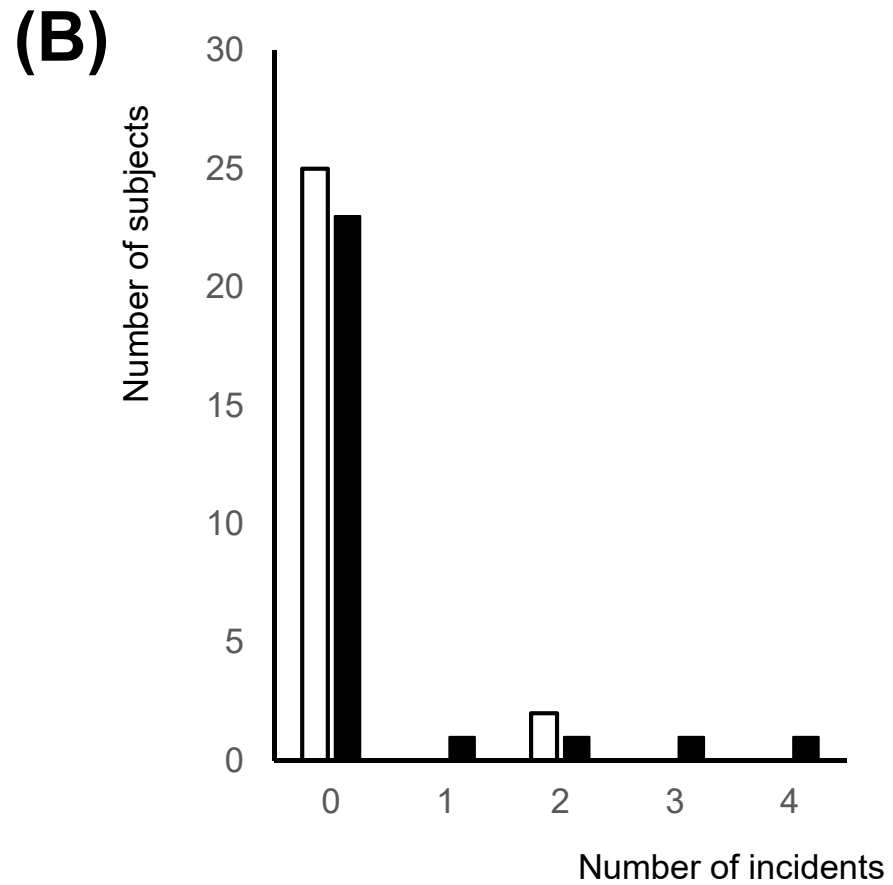

Hospitalization for pneumonia

Distribution of incidence of fever, hospitalization and hospitalization for pneumonia during the 1-year follow-up period

**(A)**

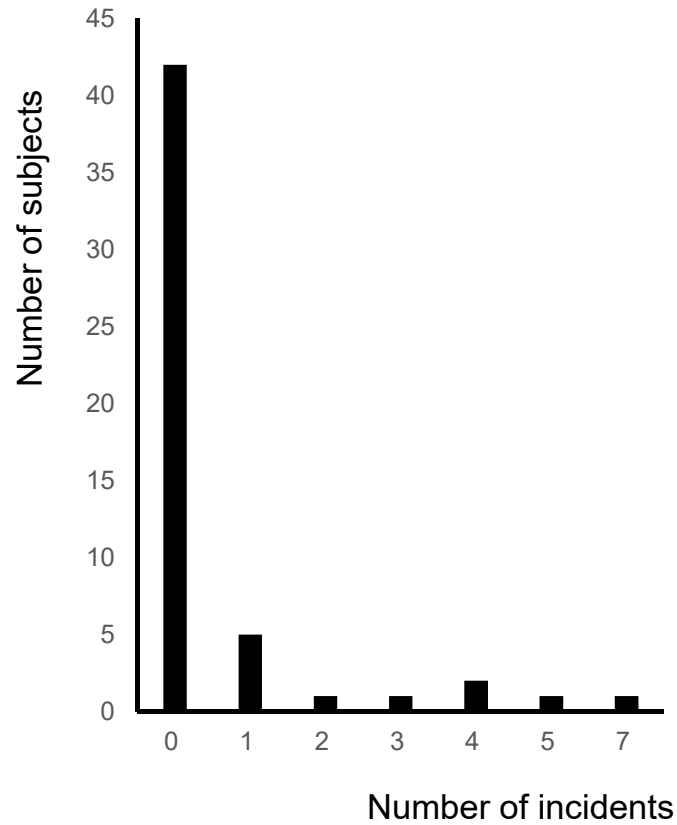

Fever

**(B)**

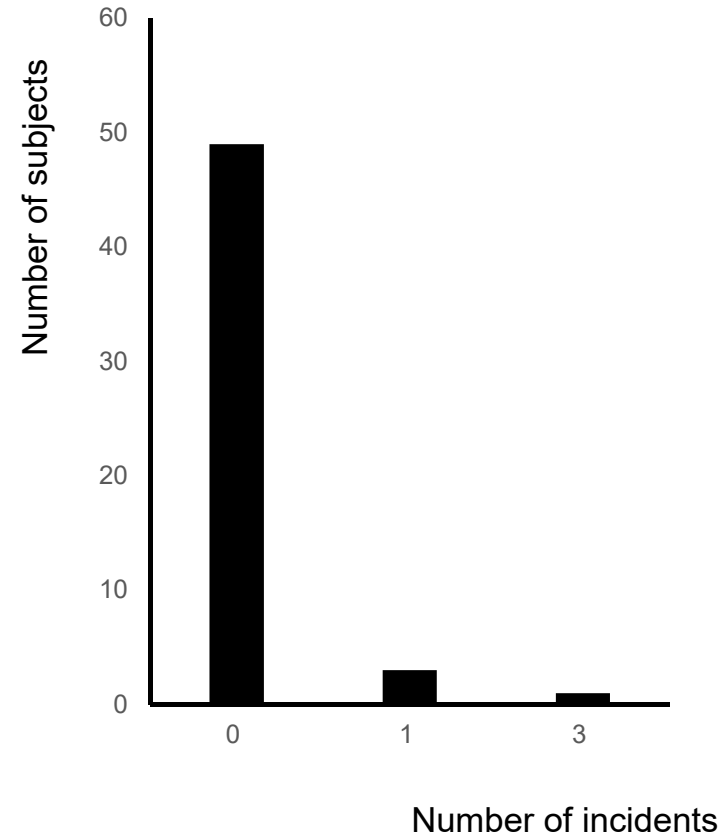

Hospitalization for pneumonia



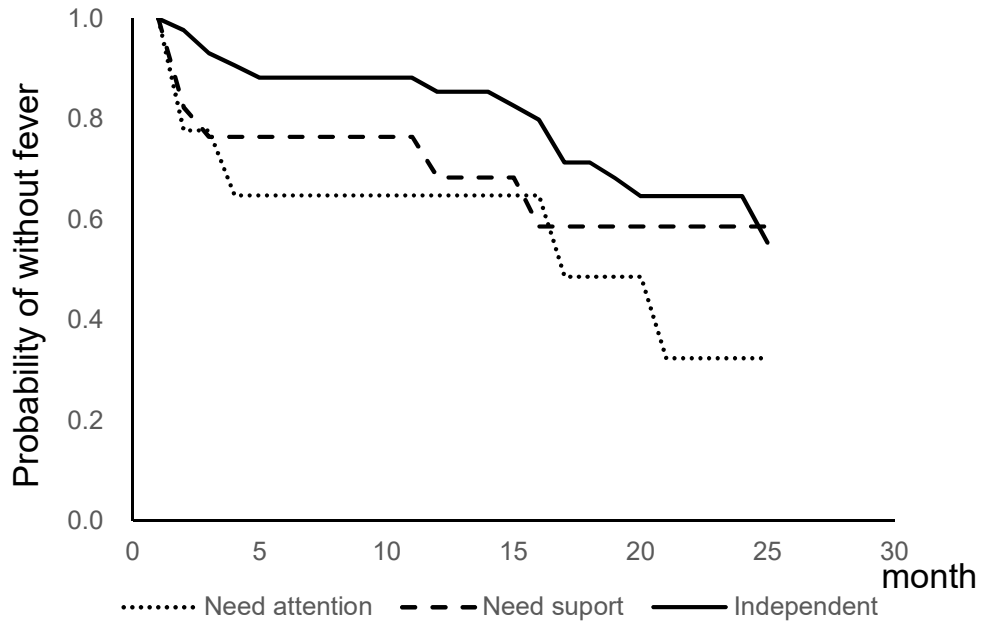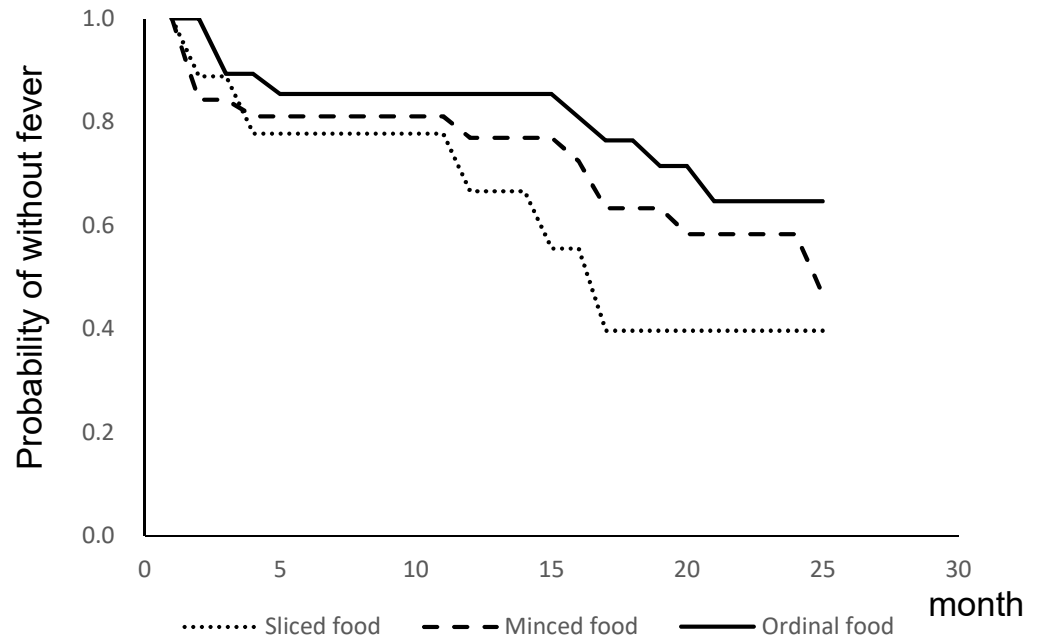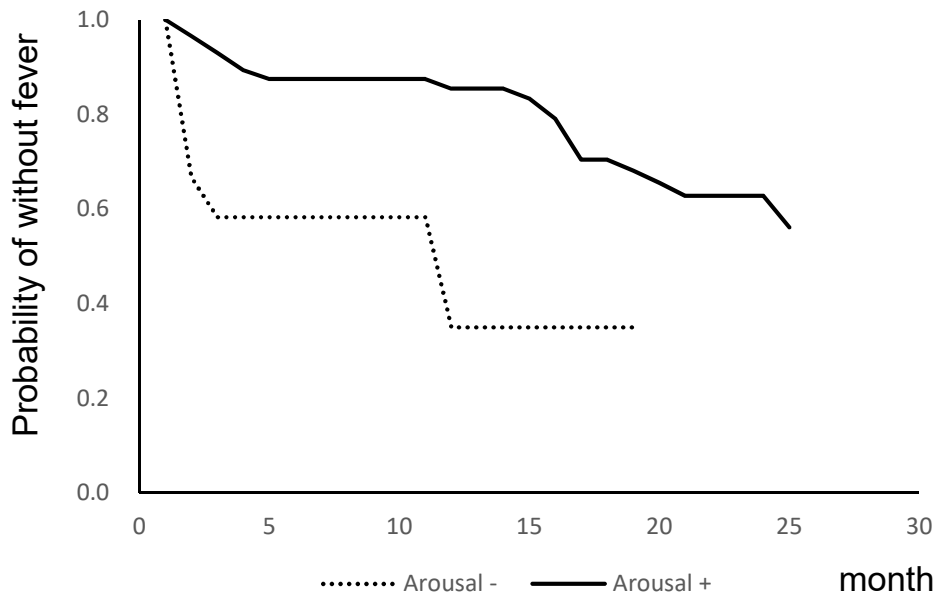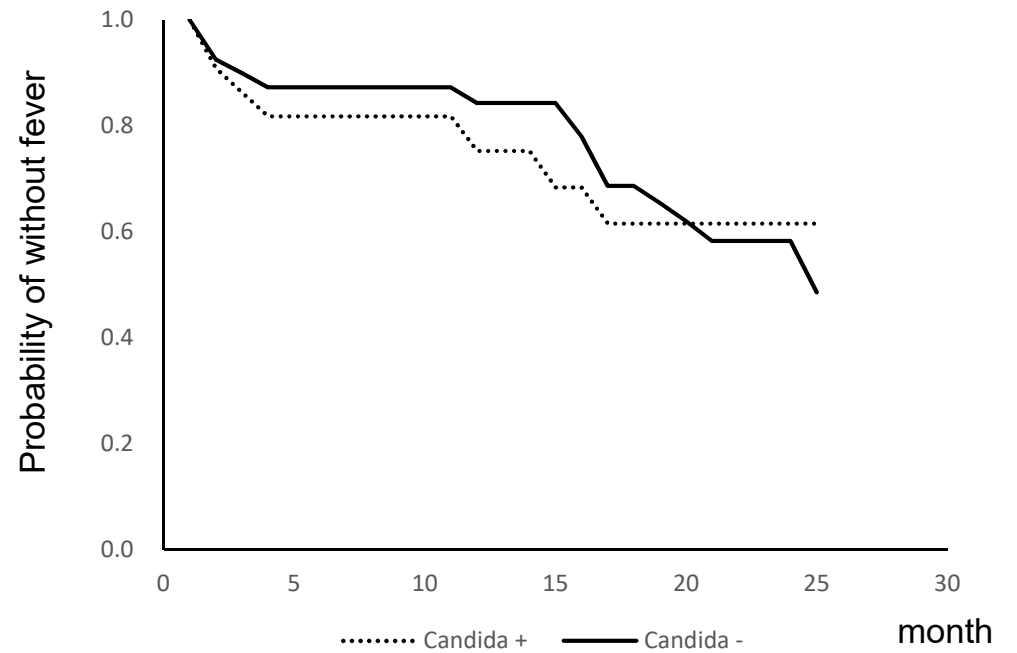

S5 Figure
